# Supplementary material
Source: Elsevier journal article supplement (https://www.sciencedirect.com/science/article/pii/S0213911118301122)
Supplement: mmc1 [file S0213911118301122:mmc1.docx]

**Appendix. Supplementary data**

Supplementary data associated with this article can be found, in the online version, at htt://[dx.doi.org/10.1016....](http://dx.doi.org/10.1016....)..
